# Supplementary material for: A New Oviraptorosaur (Dinosauria: Oviraptorosauria) from the Late Cretaceous of Southern China and Its Paleoecological Implications
Source: PLOS journal article supplement (doi:10.1371/journal.pone.0080557), 2013-11-27
Supplement: S3 (10.1371/journal.pone.0080557.s003) [file journal.pone.0080557.s003]

Table S3. Measurement (cm) of ilium of *Nankangia jiangxiensis* gen. et sp. nov.

(GMNH F10003).

|                        | Length                                                                                              | Height                                                                                                   |
|------------------------|-----------------------------------------------------------------------------------------------------|----------------------------------------------------------------------------------------------------------|
| Ilium                  | 33 (from the tip of the postacetabular process to the anterior margin of the preacetabular process) | 12 (from the center of the dorsal margin of the acetabulum to the top of the dorsal margin of the ilium) |
| Acetabulum             | Lateral side 8; medial side 5 (inner margin of the acetabulum)                                      | -                                                                                                        |
| Preacetabular process  | 17 (measured from center of acetabulum)                                                             | -                                                                                                        |
| Postacetabular process | 16 (measured from center of the acetabulum)                                                         | -                                                                                                        |
